# Supplementary material for: Chemokines as the modulators of endometrial epithelial cells remodelling
Source: PubMed Central journal article supplement (PMC6736846; doi:10.1038/s41598-019-49502-5), 2019-09-10
Supplement: 41598_2019_49502_MOESM1_ESM.pdf [file 41598_2019_49502_MOESM1_ESM.pdf]

# Title: Chemokines as the modulators of endometrial epithelial cells remodelling

**Złotkowska A, Andronowska A\***

*Department of Hormonal Action Mechanisms, Institute of Animal Reproduction and Food Research of the Polish Academy of Sciences, Olsztyn, Poland*

**\*Corresponding author at:** Institute of Animal Reproduction and Food Research of Polish Academy of Sciences; Tuwima 10 Str., 10-748 Olsztyn, Tel. +48 89 523 46 86; fax +48 89 524. \*E-mail: [a.andronowska@pan.olsztyn.pl](mailto:a.andronowska@pan.olsztyn.pl) (Andronowska A)

### Supplementary Data 1: Recombinant chemokines used for in vitro studies

| <b>Chemokine</b> | <b>Origin</b> | <b>Catalog number</b> |
|------------------|---------------|-----------------------|
| <b>CCL2</b>      | Human         | 300-04                |
| <b>CCL4</b>      | Human         | 300-09                |
| <b>CCL5</b>      | Human         | 300-06                |
| <b>CCL8</b>      | Murine        | 250-14                |
| <b>CXCL2</b>     | Murine        | 250-15                |
| <b>CXCL8</b>     | Human         | 200-08                |
| <b>CXCL9</b>     | Murine        | 250-18                |
| <b>CXCL10</b>    | Human         | 300-12                |
| <b>CXCL12</b>    | Murine        | 250-20A               |

## Supplementary Data 2: Antibodies used for immunocytochemistry

| Target protein | Dilution | Company                  | Catalog number |
|----------------|----------|--------------------------|----------------|
| CCR1           | 1:50     | Santa Cruz Biotechnology | sc-7934        |
| CCR2           | 1:200    | Abcam                    | ab21667        |
| CCR3           | 1:50     | Santa Cruz Biotechnology | sc-7897        |
| CCR5           | 1:50     | Santa Cruz Biotechnology | sc-13950       |
| CXCR2          | 1:100    | Abcam                    | ab14935        |
| CXCR3          | 1:200    | Abcam                    | ab71864        |
| CXCR4          | 1:100    | Abcam                    | ab2074         |

### Supplementary Data 3: Probes used for real-time PCR

| Target gene    | GeneBank accession number | Assay ID      |
|----------------|---------------------------|---------------|
| <b>CCL2</b>    | NM_214214.1               | Ss03394377_ml |
| <b>CCL4</b>    | NM_213779.1               | Ss03381395_u1 |
| <b>CCL5</b>    | NM_001129946.1            | Ss03341385_u1 |
| <b>CCL8</b>    | NM_001164515.1            | Ss04245586_ml |
| <b>CXCL2</b>   | NM_001001861.2            | Ss03378360_u1 |
| <b>CXCL8</b>   | NM_213867.1               | Ss03392437_ml |
| <b>CXCL9</b>   | NM_001114289.2            | Ss03390033_ml |
| <b>CXCL10</b>  | NM_001008691.1            | Ss03391846_ml |
| <b>CXCL12</b>  | NM_001009580.1            | Ss03391855_ml |
| <b>CCR1</b>    | NM_001001621.1            | Ss03378192_u1 |
| <b>CCR2</b>    | NM_001001619.1            | Ss03378154_u1 |
| <b>CCR3</b>    | NM_001001620.1            | Ss03378176_u1 |
| <b>CCR5</b>    | NM_001001618.1            | Ss03378121_u1 |
| <b>CXCR2</b>   | AK237564.1                | Ss03376125_s1 |
| <b>CXCR3</b>   | AJ851240.1                | Ss03375858_u1 |
| <b>CXCR4</b>   | NM_213773.1               | Ss03392297_s1 |
| <b>B-actin</b> | AK237086.1                | Ss03376081_u1 |
| <b>GAPDH</b>   | AF141959.1                | Ss03375435_u1 |

### Supplementary Data 4: Primers used for real-time PCR

| Target gene    | Gene Bank accession number | Forward                  | Reverse                  | Melting temperature (°C) |
|----------------|----------------------------|--------------------------|--------------------------|--------------------------|
| <b>MUC1</b>    | XM_021089730.1             | CAGTGAAGTTAGTGCCTGGG     | CCACAGTTCTTTCGTCGGC      | 60                       |
| <b>SPP1</b>    | XM_005667005.3             | AAGAAGTTCCGCAGATCCGA     | TGTCCAAGTCAGAAGCCACG     | 60                       |
| <b>TJP1</b>    | XM_021098891.1             | CCCGAGAAGTTACGTGCTGAA    | CGCTACGGCCCAGATAAACA     | 60                       |
| <b>B-actin</b> | U07786.1                   | ACATCAAGGAGAAGCTCTGCTACG | GAGGGGCGATGATCTTGATCTTCA | 60                       |
| <b>GAPDH</b>   | KJ786424.1                 | TCGGAGTGAACGGATTTG       | CCTGGAAGATGGTGATGG       | 60                       |

**Supplementary Data 5: Control of epithelial cells proliferation with newborn calf serum (NCS) in the proliferation assay (A) and scratch assay (B).**

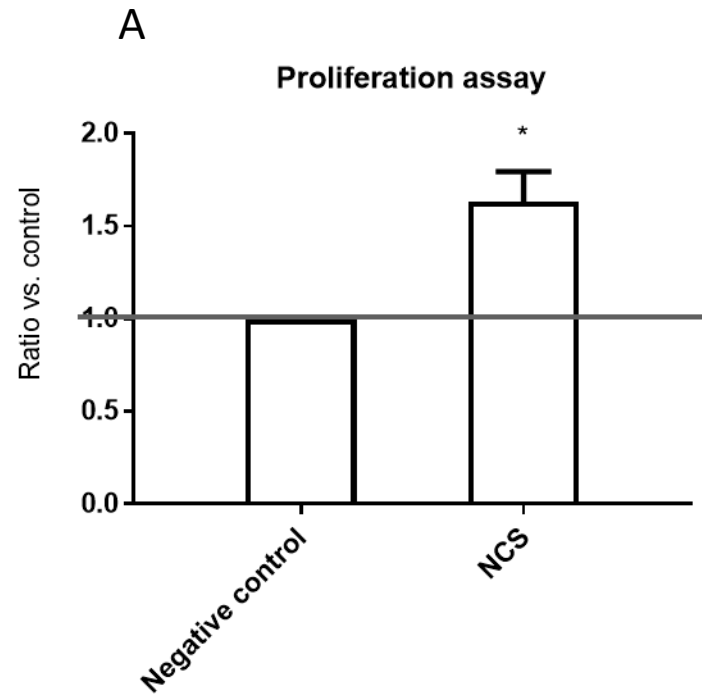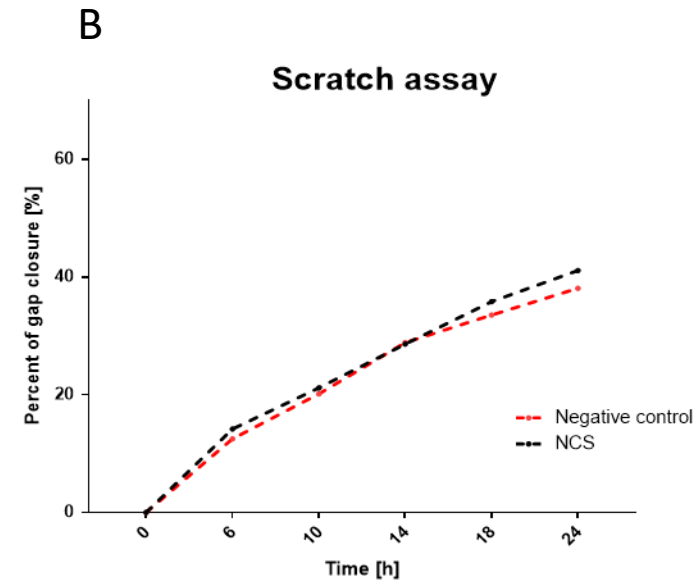

**Supplementary Data 6: Concentration of CXCL12 in porcine blood serum.**

**All data are expressed as the mean±SD.**

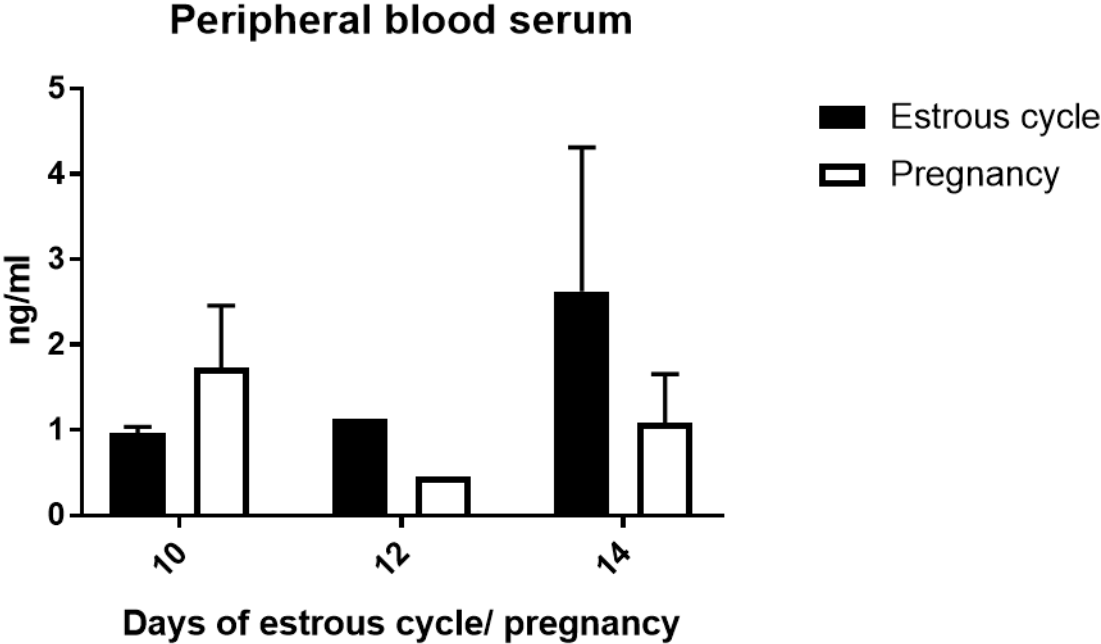

Mean±SD: 1,467±1,19 ng/ml
